# Supplementary material for: Effect of ionic radii on the Curie temperature in Ba1-x-ySrxCayTiO3 compounds
Source: PubMed Central journal article supplement (PMC4914972; doi:10.1038/srep28055), 2016-06-21
Supplement: srep28055-s1.pdf [file srep28055-s1.pdf]

# Effect of ionic radii on the Curie temperature in $\text{Ba}_{1-x-y}\text{Sr}_x\text{Ca}_y\text{TiO}_3$ compounds

A. Berenov,<sup>a</sup> F. Le Goupil<sup>a</sup> and N. Alford<sup>a</sup>

<sup>a</sup> Department of Materials, Imperial College London, London, SW7 2AZ, UK.

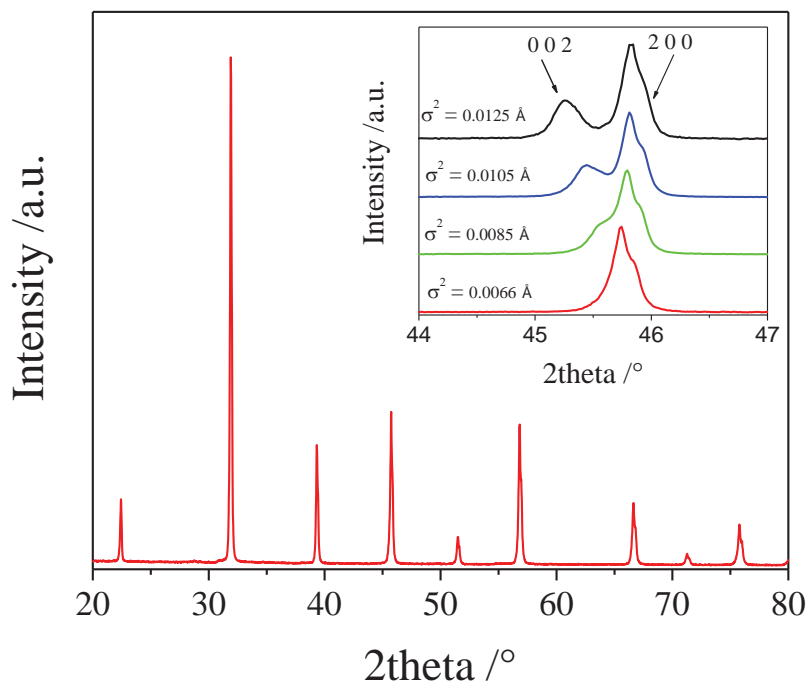

Supplementary Figure S1. XRD pattern of  $\text{Ba}_{0.65}\text{Sr}_{0.35}\text{TiO}_3$ . The inset shows tetragonal splitting of (200) peak in series A compounds.

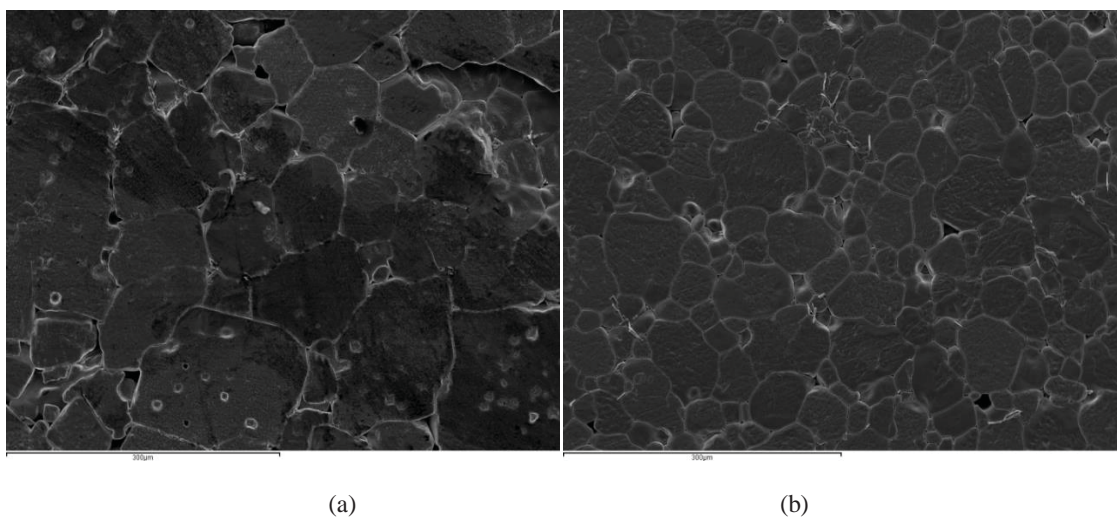

Supplementary Figure S2. SEM images of  $\text{Ba}_{0.65}\text{Sr}_{0.35}\text{TiO}_3$  (a) and  $\text{Ba}_{0.78}\text{Ca}_{0.22}\text{TiO}_3$  (b) pellets thermally etched at 1400  $^\circ\text{C}$  for 0.5 hrs

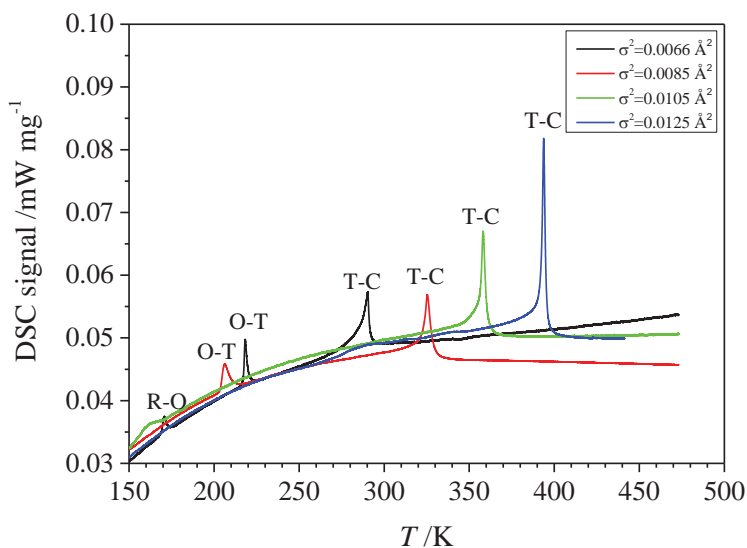

Supplementary Figure S3. Temperature dependences of DSC signal for compounds from series A.

Supplementary Table S4 ICP and DSC results of studied BSCT samples.

| Intended composition               | Analysed composition                            | $T_{R-O} / K$ | $T_{O-T} / K$ | $T_C / K$ |
|------------------------------------|-------------------------------------------------|---------------|---------------|-----------|
| Series A                           |                                                 |               |               |           |
| $Ba_{0.65}Sr_{0.35}TiO_3$          | $Ba_{0.655(2)}Sr_{0.349(1)}TiO_3$               | 171           | 218           | 291       |
| $Ba_{0.69}Sr_{0.24}Ca_{0.07}TiO_3$ | $Ba_{0.704(2)}Sr_{0.237(1)}Ca_{0.076(1)}TiO_3$  | 145           | 206           | 325       |
| $Ba_{0.74}Sr_{0.12}Ca_{0.15}TiO_3$ | $Ba_{0.742(14)}Sr_{0.120(2)}Ca_{0.144(1)}TiO_3$ | NA            | 163           | 358       |
| $Ba_{0.78}Ca_{0.22}TiO_3$          | $Ba_{0.798(9)}Ca_{0.206(1)}TiO_3$               | NA            | NA            | 394       |
| Series B                           |                                                 |               |               |           |
| $Ba_{0.8}Sr_{0.2}TiO_3$            | $Ba_{0.796(3)}Sr_{0.197(1)}TiO_3$               | 187           | 251           | 341       |
| $Ba_{0.6}Sr_{0.2}Ca_{0.2}TiO_3$    | $Ba_{0.607(6)}Sr_{0.202(3)}Ca_{0.198(1)}TiO_3$  | NA            | NA            | 320       |
| $Ba_{0.9}Ca_{0.1}TiO_3$            | $Ba_{0.887(1)}Ca_{0.113(2)}TiO_3$               | 139           | 224           | 402       |
| $Ba_{0.85}Sr_{0.1}Ca_{0.05}TiO_3$  | $Ba_{0.854(2)}Sr_{0.100(1)}Ca_{0.046(1)}TiO_3$  | 173           | 248           | 376       |
| $Ba_{0.78}Sr_{0.1}Ca_{0.12}TiO_3$  | $Ba_{0.794(2)}Sr_{0.103(1)}Ca_{0.103(1)}TiO_3$  | NA            | NA            | 369       |
| $Ba_{0.75}Sr_{0.1}Ca_{0.15}TiO_3$  | $Ba_{0.754(2)}Sr_{0.101(1)}Ca_{0.145(1)}TiO_3$  | NA            | NA            | 363       |
| $Ba_{0.7}Sr_{0.1}Ca_{0.2}TiO_3$    | $Ba_{0.704(1)}Sr_{0.102(1)}Ca_{0.195(1)}TiO_3$  | NA            | NA            | 357       |
| Series C                           |                                                 |               |               |           |
| $Ba_{0.68}Sr_{0.32}TiO_3$          | $Ba_{0.692(3)}Sr_{0.321(6)}TiO_3$               | 176           | 227           | 302       |
| $Ba_{0.62}Sr_{0.28}Ca_{0.1}TiO_3$  | $Ba_{0.625(3)}Sr_{0.283(4)}Ca_{0.098(1)}TiO_3$  | NA            | 180           | 307       |

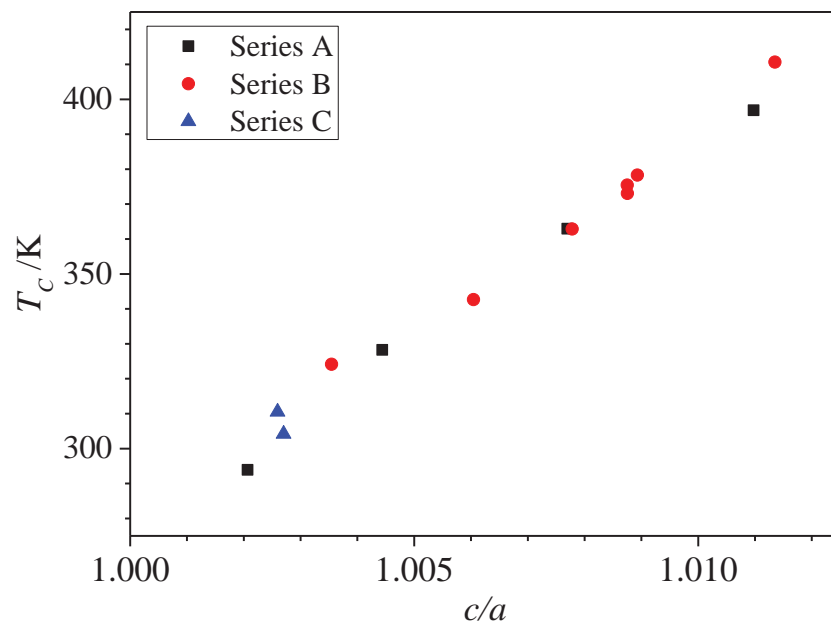

Supplementary Figure S5.  $T_C$  as a function of  $c/a$  for the studied compounds.

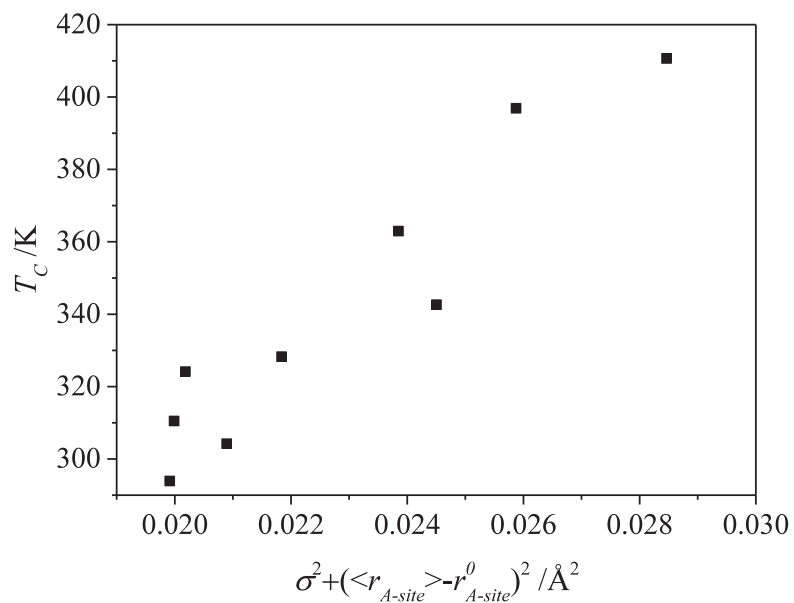

Supplementary Figure S6.  $T_C$  as a function of  $\sigma^2 + (\langle r_{A-site} \rangle - r_{A-site}^0)^2$  for samples studied in this work.

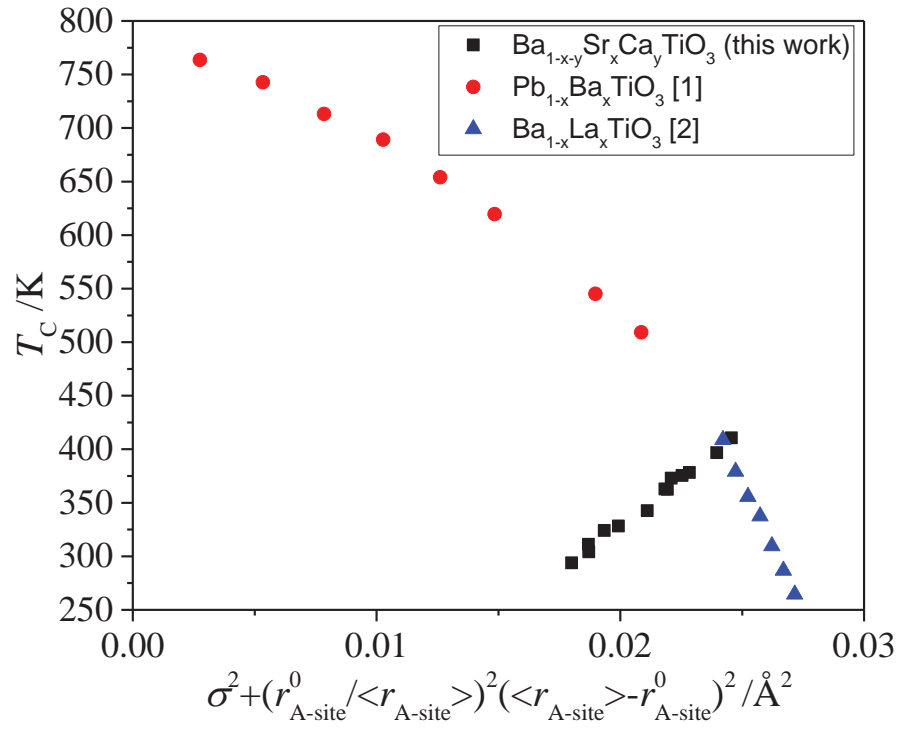

Supplementary Figure S7.  $T_c$  as a function of  $\sigma^2 + \left(\frac{r_{A-site}^0}{\langle r_{A-site} \rangle}\right)^2 (\langle r_{A-site} \rangle - r_{A-site}^0)^2$  for titanates with isoelectronic ( $\text{Ba}_{1-x-y}\text{Sr}_x\text{Ca}_y\text{TiO}_3$  this work) and non-isoelectronic ( $\text{Pb}_{1-x}\text{Ba}_x\text{TiO}_3$ <sup>1</sup>,  $\text{Ba}_{1-x}\text{La}_x\text{TiO}_3$ <sup>2</sup>) doping on the A site.

<sup>1</sup> T. Ikeda, J. Phys. Soc. Jap. **14** 1286 (1959)

<sup>2</sup> L. Ben and D. C. Sinclair, Appl. Phys. Lett., **98** 092907 (2011)
